# Supplementary material
Source: PubMed Central journal article supplement (PMC196848)

**B**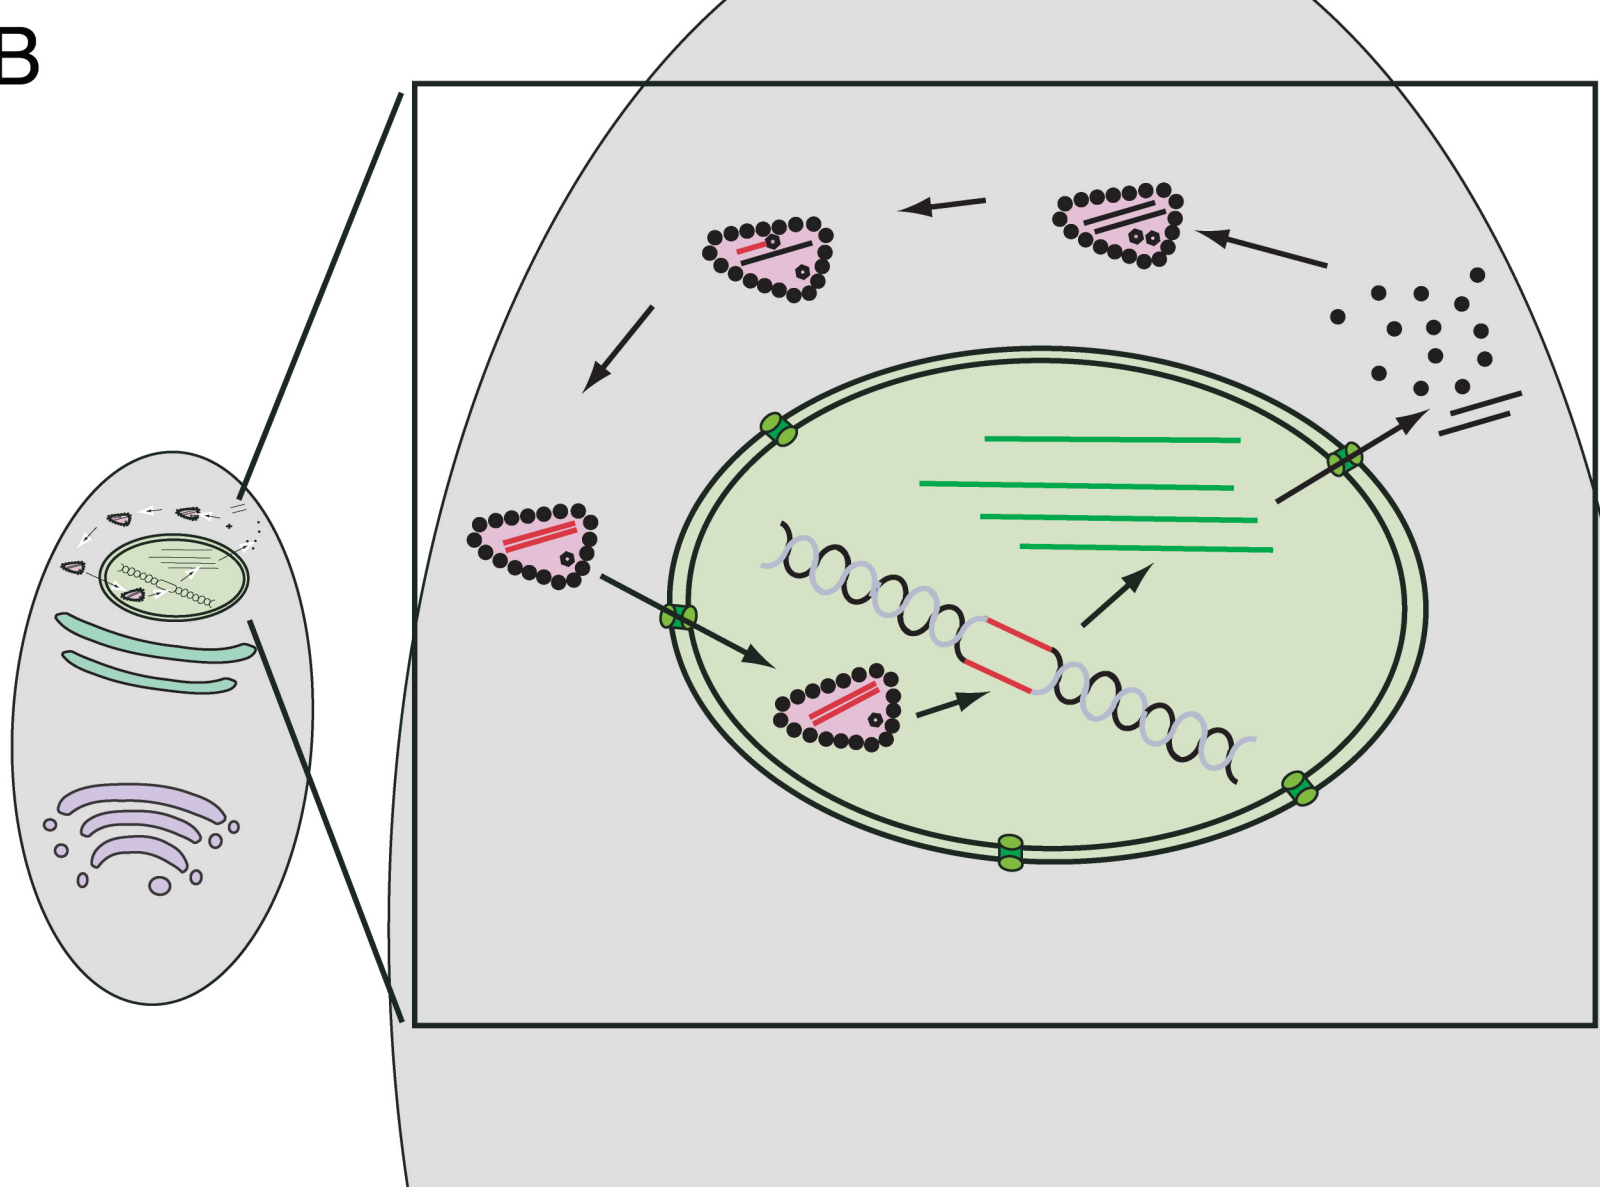

Supplement: pnas_100_19_10592__10.pdf [file pnas_100_19_10592__10.pdf]

**A**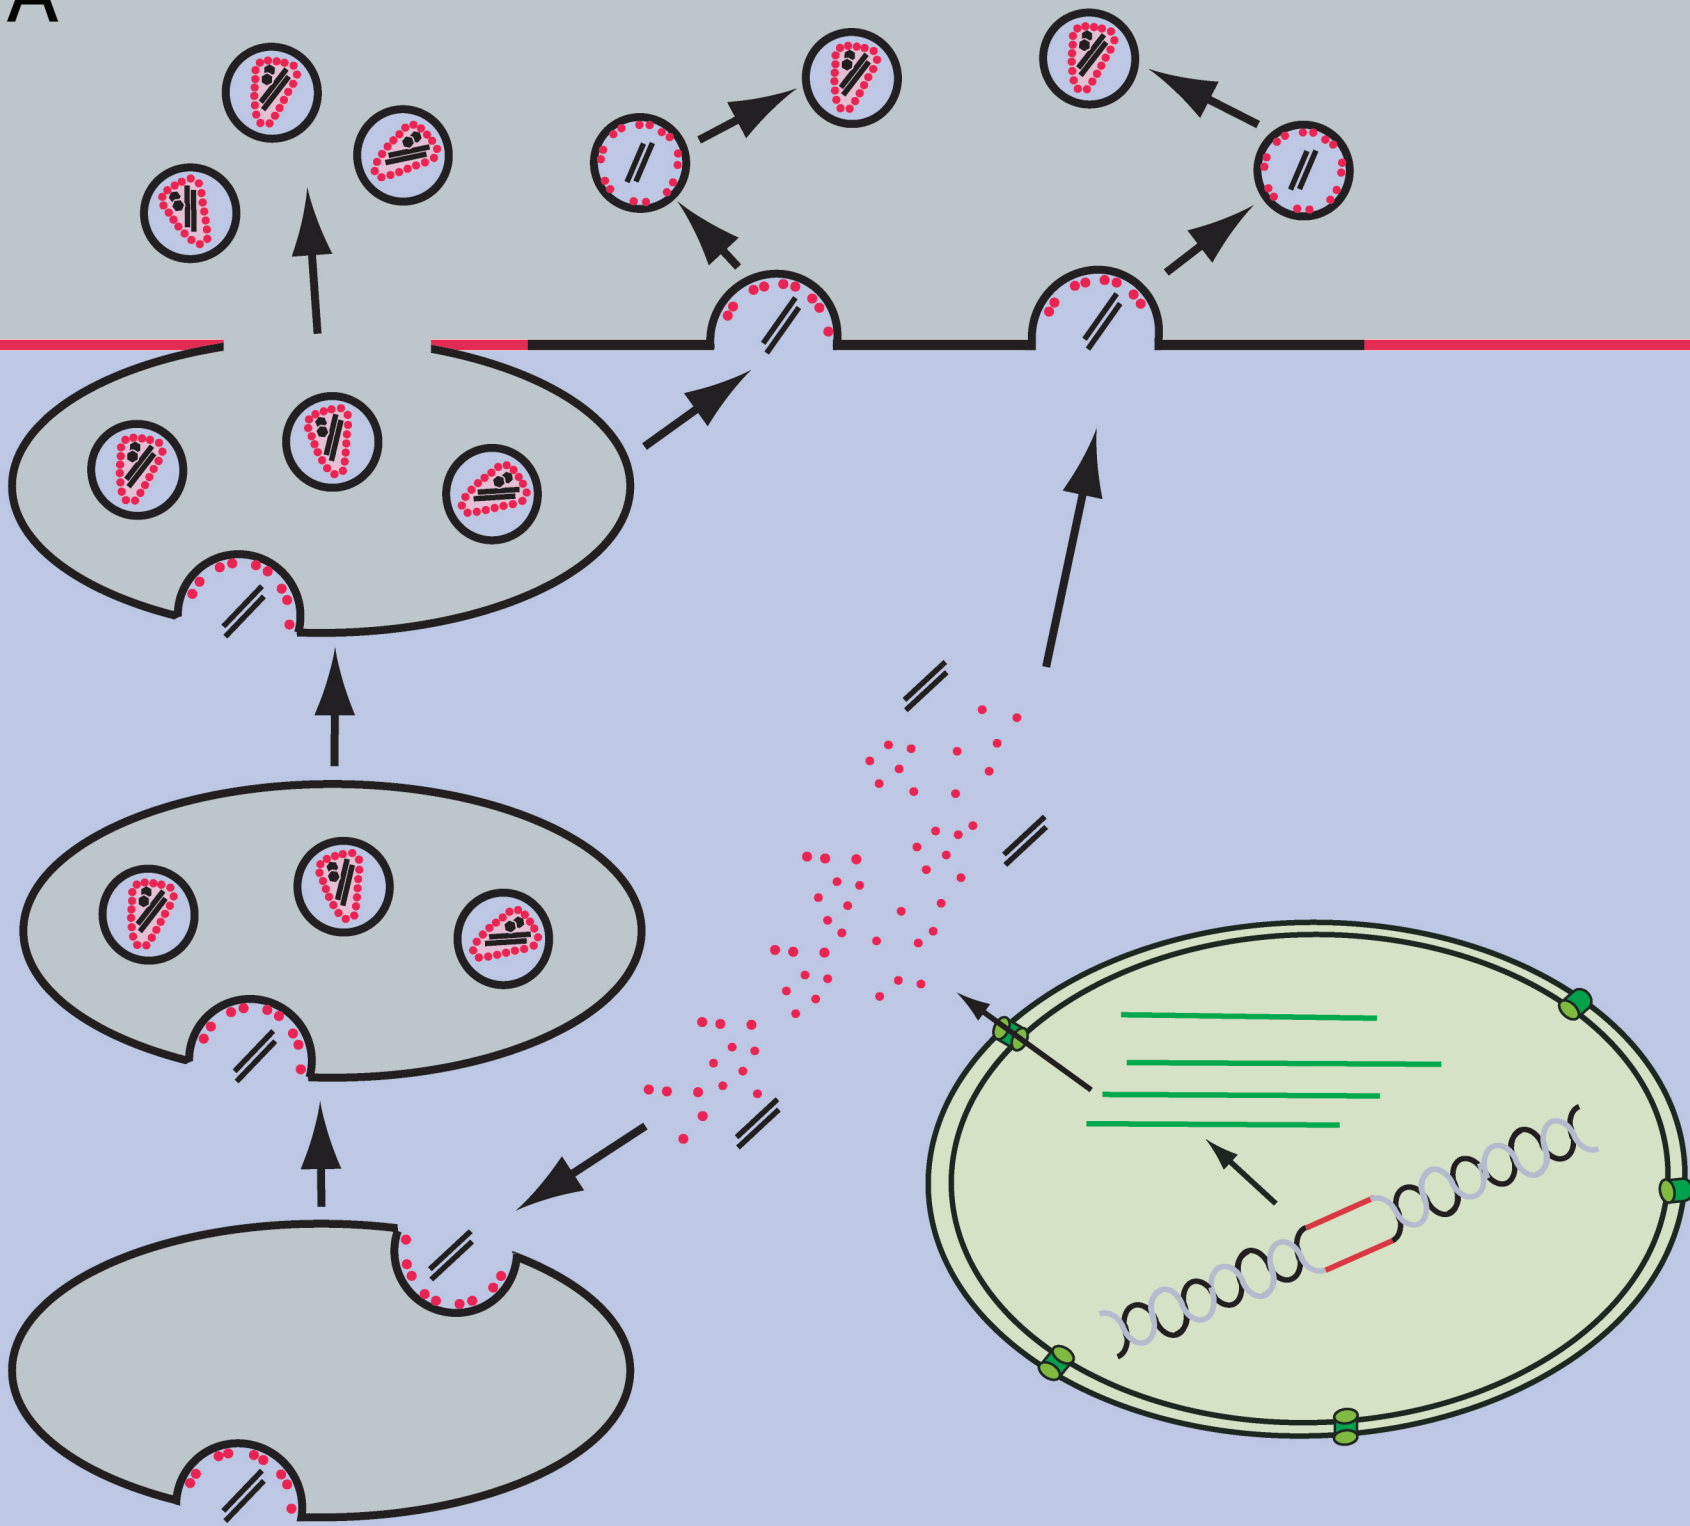

Supplement: pnas_100_19_10592__6.pdf [file pnas_100_19_10592__6.pdf]

B

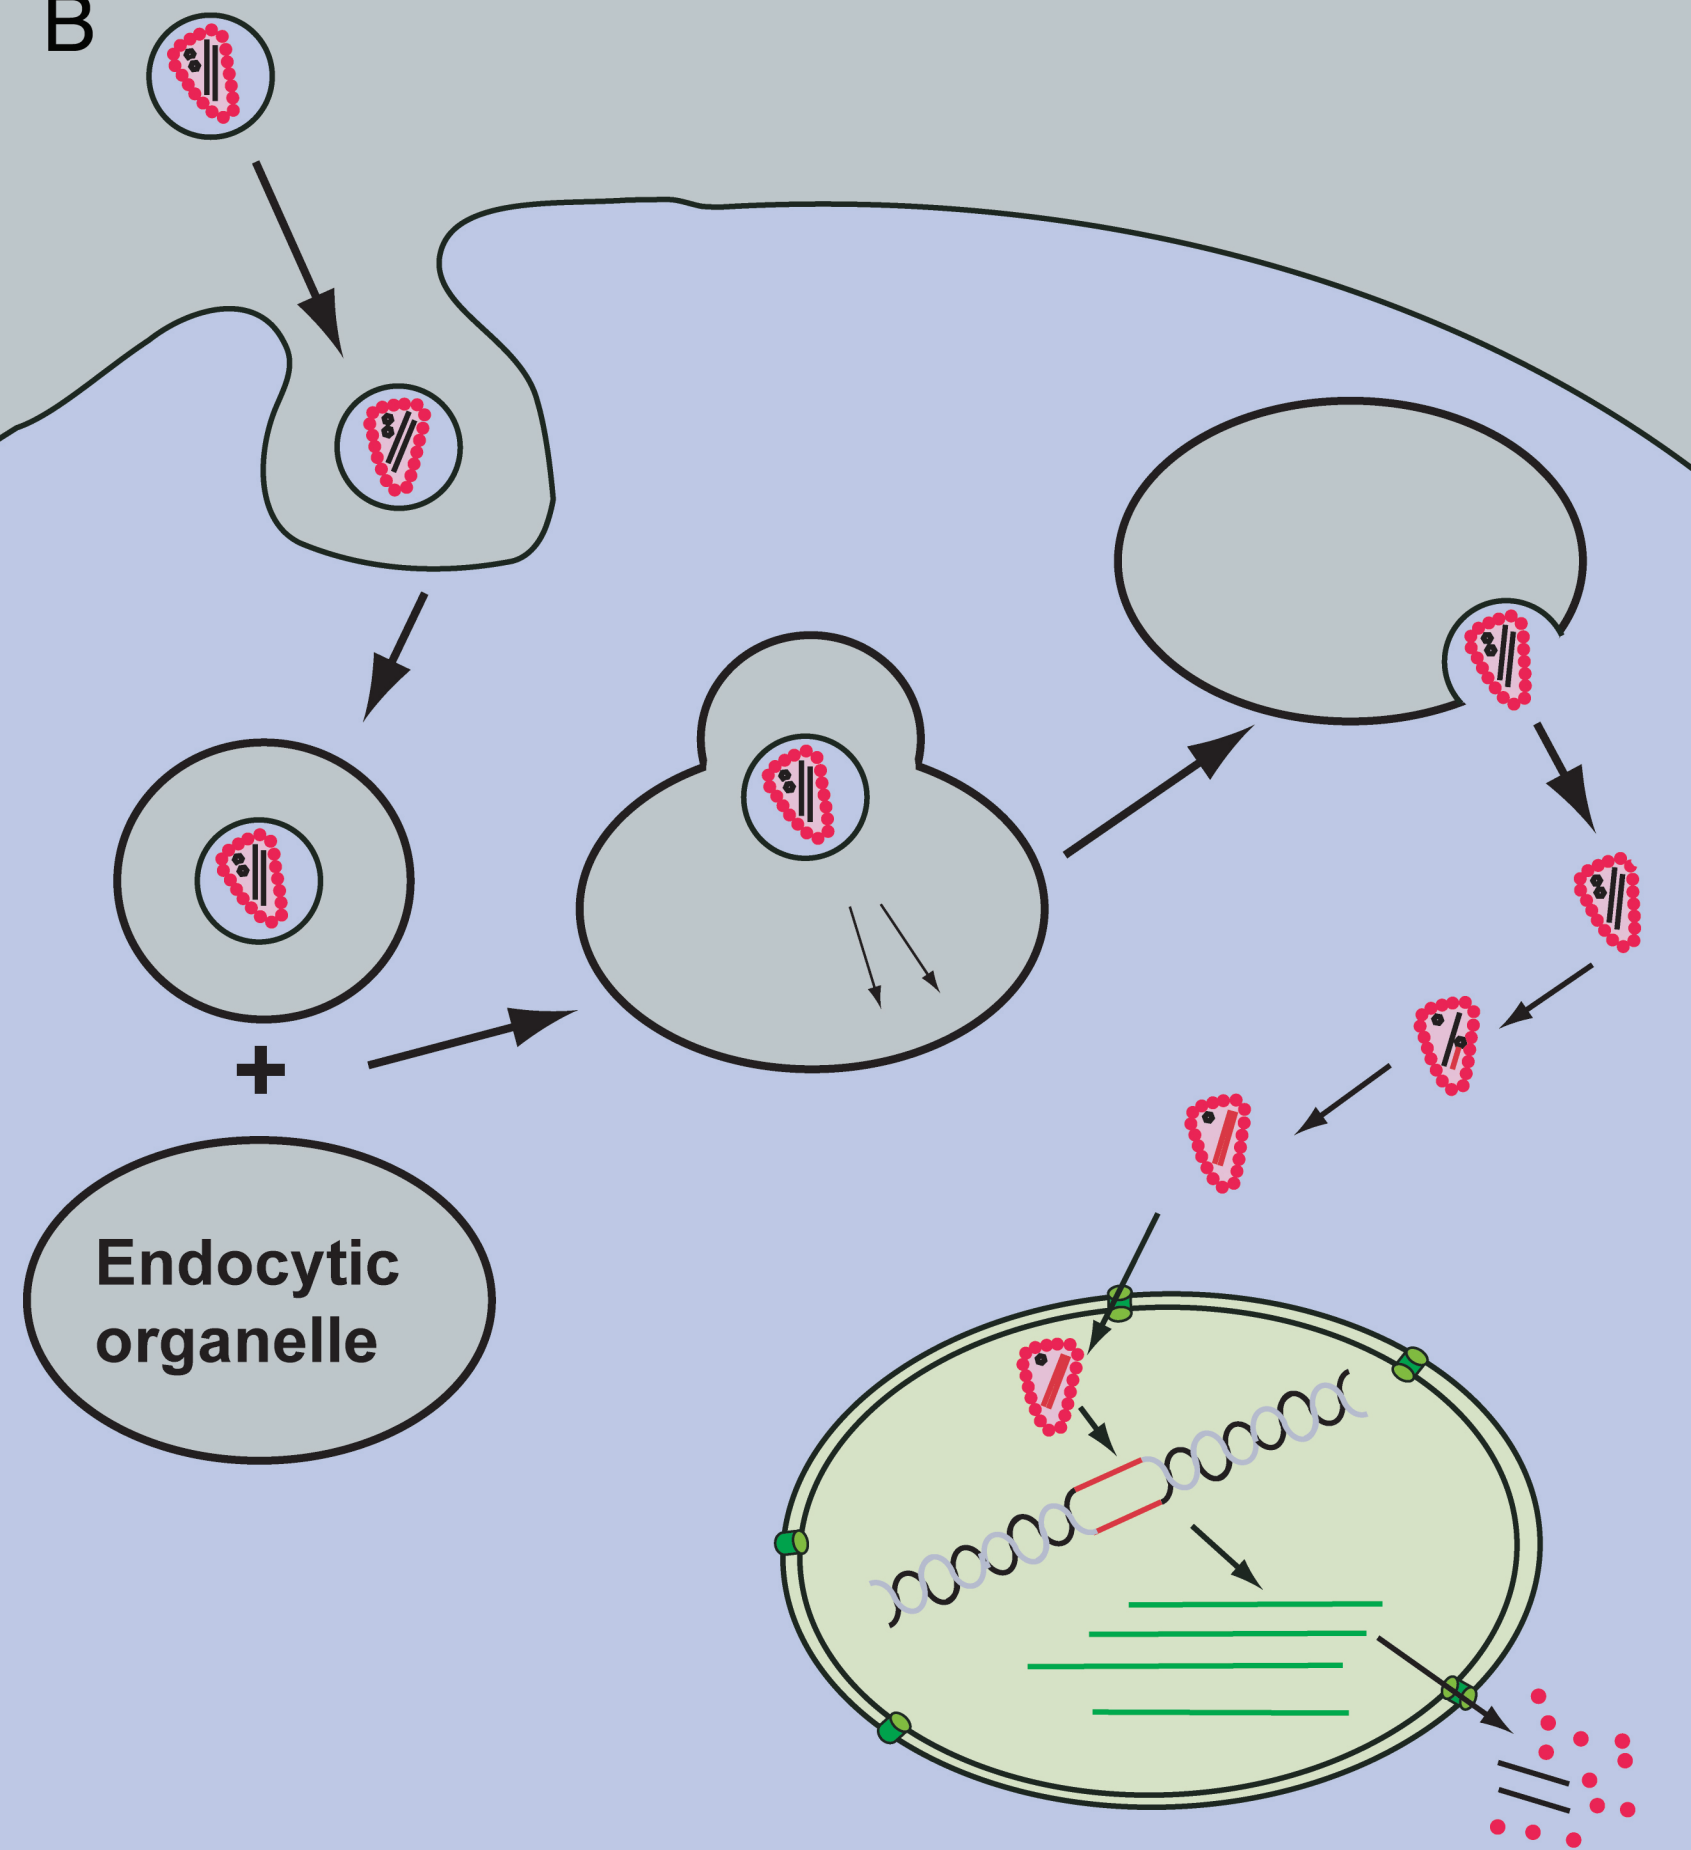

Supplement: pnas_100_19_10592__7.pdf [file pnas_100_19_10592__7.pdf]

**A**

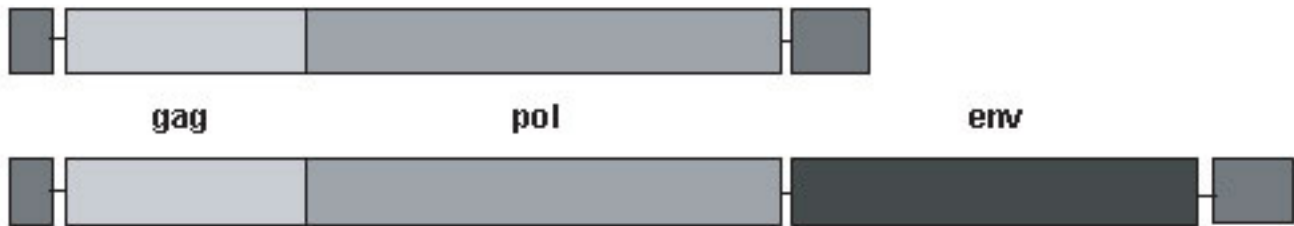

Supplement: pnas_100_19_10592__9.pdf [file pnas_100_19_10592__9.pdf]
